# Supplementary material for: Anticancer and Anti-Inflammatory Activities of a Standardized Dichloromethane Extract fromPiper umbellatumL. Leaves
Source: Hindawi journal article supplement (doi:10.1155/2015/948737), 2015-01-01
Supplement: f1 [file 948737.f1.pdf]

## Supplementary information section

A.

| concentration<br>( $\mu\text{g/mL}$ ) | area     |
|---------------------------------------|----------|
| 48                                    | 570203   |
| 96                                    | 1068015  |
| 193                                   | 2188404  |
| 240                                   | 2745412  |
| 288                                   | 3290756  |
| 479                                   | 5340609  |
| 719                                   | 8258301  |
| 957                                   | 11108126 |

B.

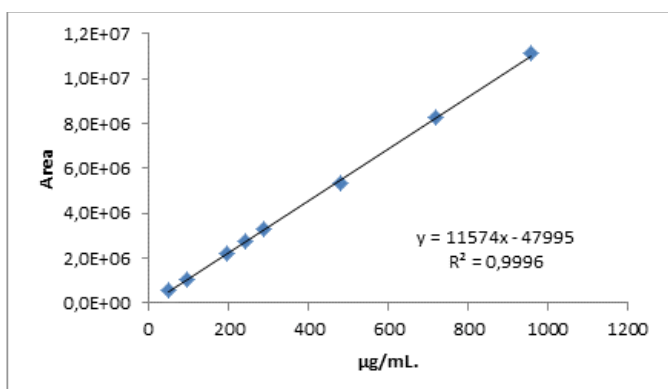

**Figure S1.** Analytical curve of 4-nerolidylcatechol. A. Stock solutions of DCE (2396  $\mu\text{g/mL}$ ) were prepared in methanol and successively diluted in the range of 48 to 957  $\mu\text{g/mL}$ , two replicates each, in methanol. All samples were analyzed by HPLC. B. Correlation area under the curve (AUC) with the respective concentration of DCE.

## Supplementary information section

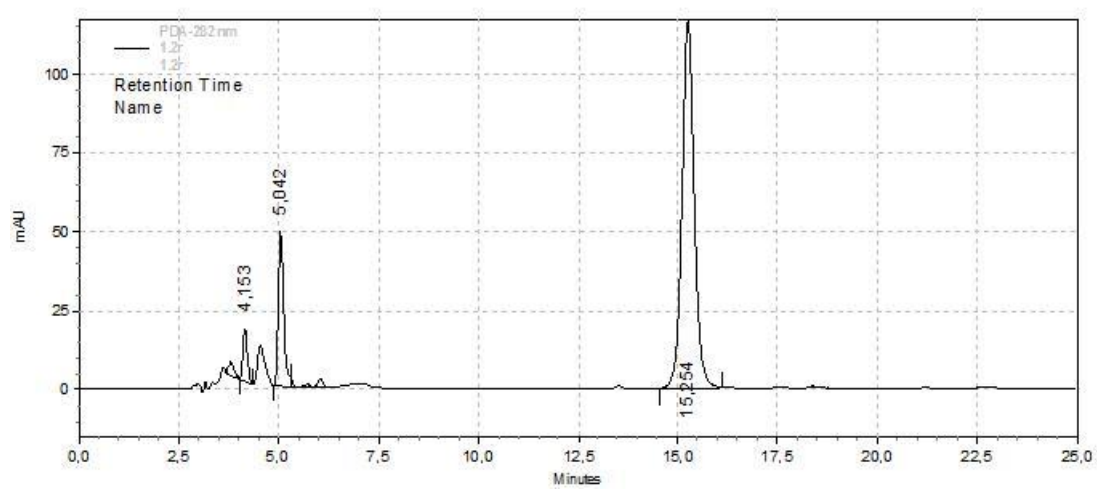

**Figure S2:** HPLC/DAD chromatogram of the dichloromethane crude extract from *P. umbellatum* leaves.
